# Supplementary material for: A comprehensive characterisation of phaeochromocytoma and paraganglioma tumours through histone protein profiling, DNA methylation and transcriptomic analysis genome wide
Source: PubMed Central journal article supplement (PMC10734084; doi:10.1186/s13148-023-01598-3), 2023-12-20

# PCA of the 50,000 most variable probes

cluster 1 cluster 1b cluster 2 normal sporadic

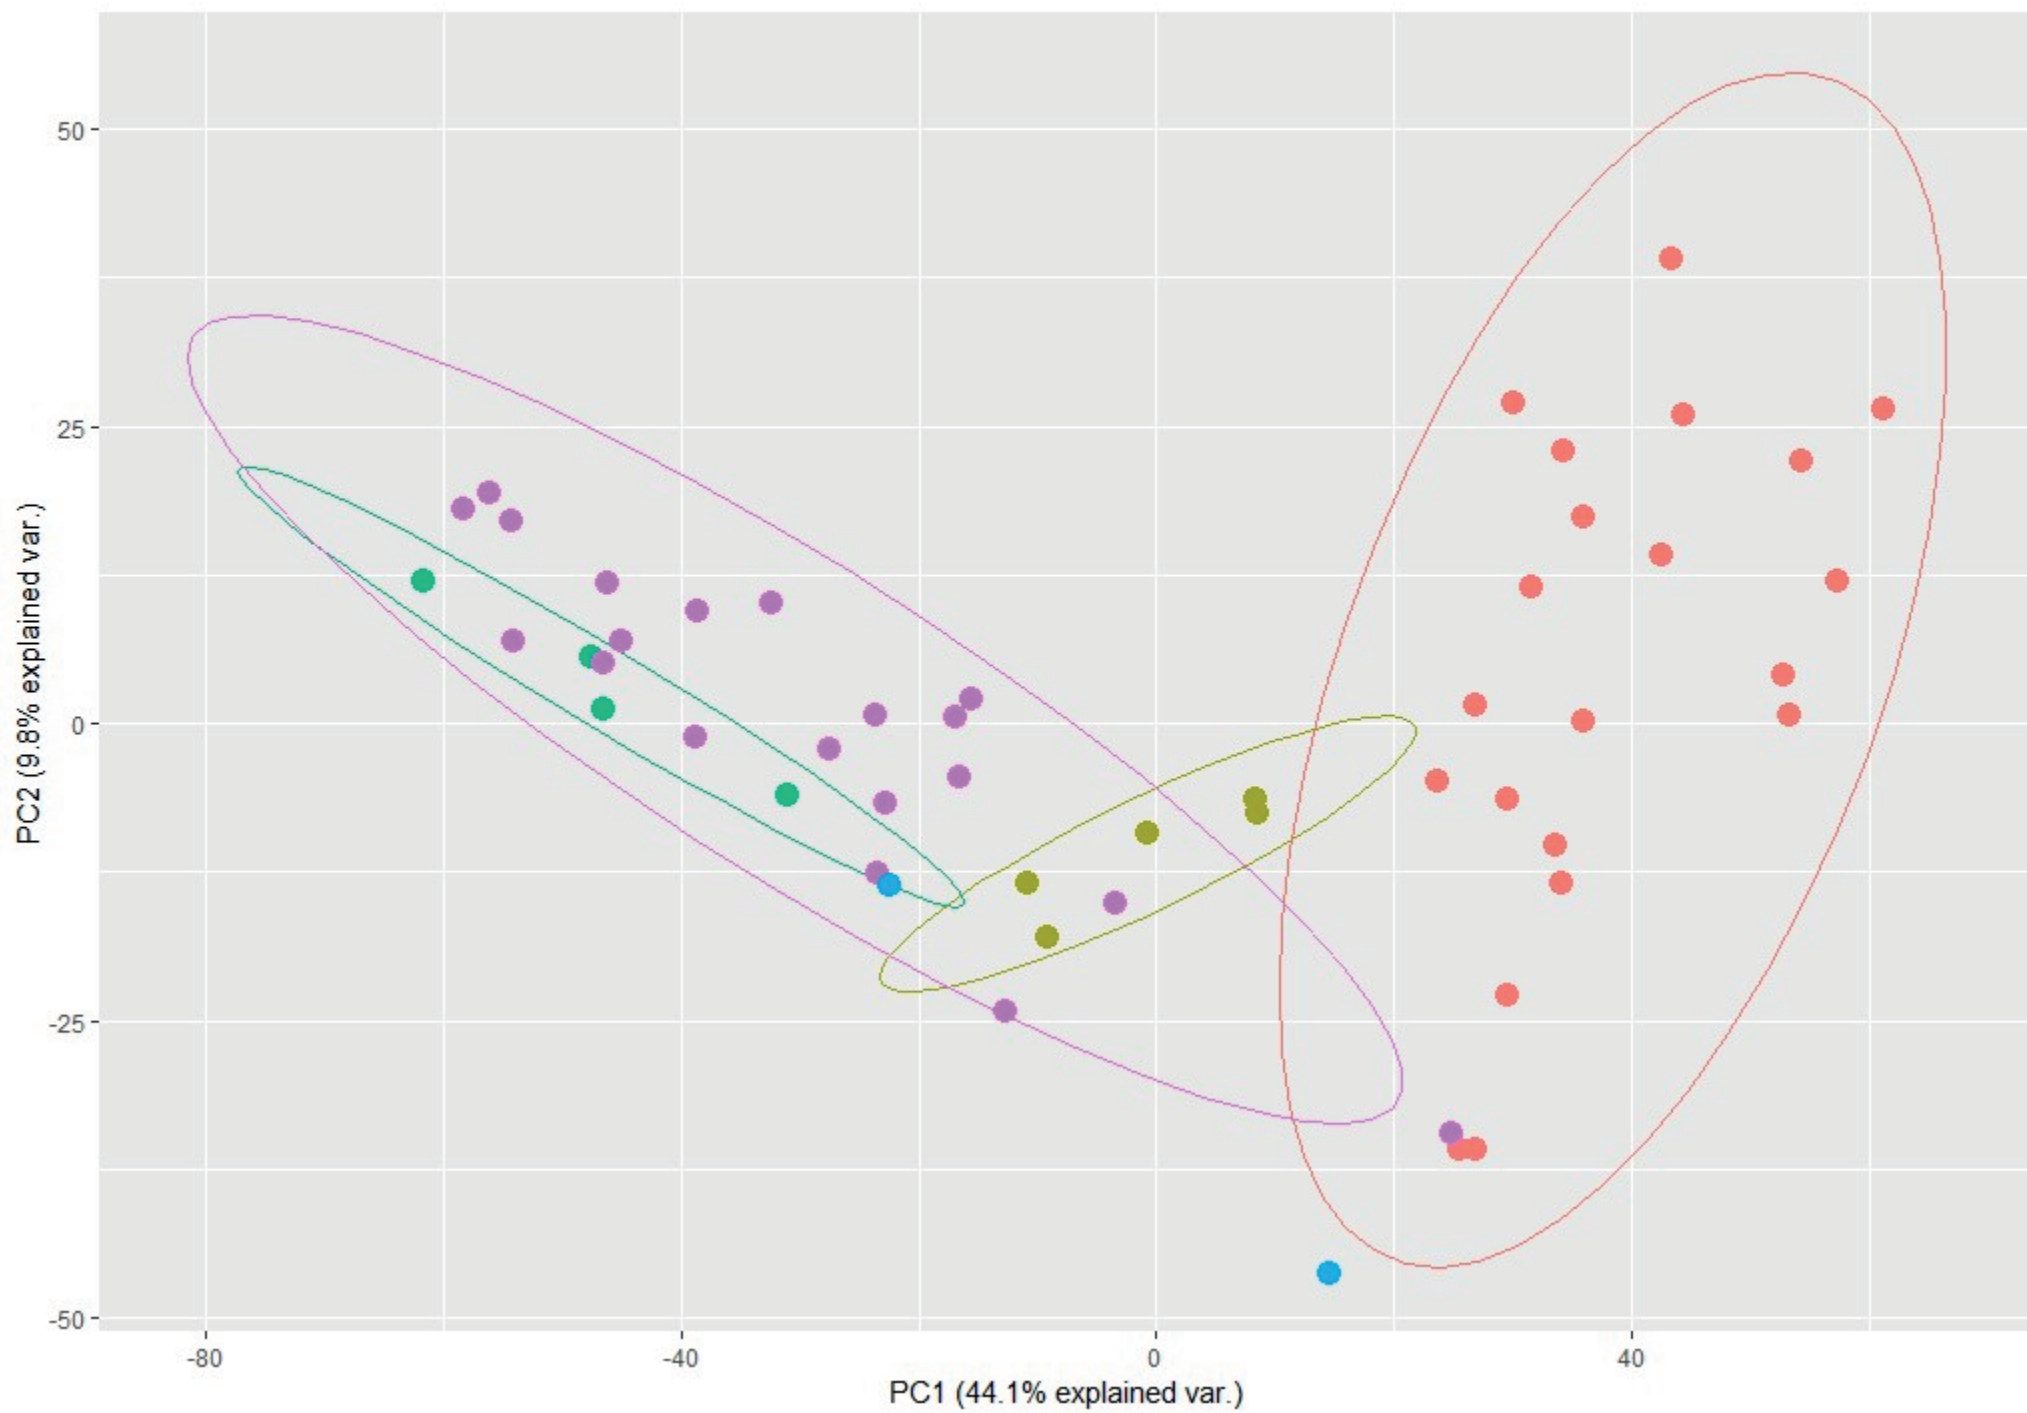

Supplement: 13148_2023_1598_MOESM2_ESM.pdf [file 13148_2023_1598_MOESM2_ESM.pdf]
