# Supplementary material for: A comprehensive characterisation of phaeochromocytoma and paraganglioma tumours through histone protein profiling, DNA methylation and transcriptomic analysis genome wide
Source: PubMed Central journal article supplement (PMC10734084; doi:10.1186/s13148-023-01598-3), 2023-12-20

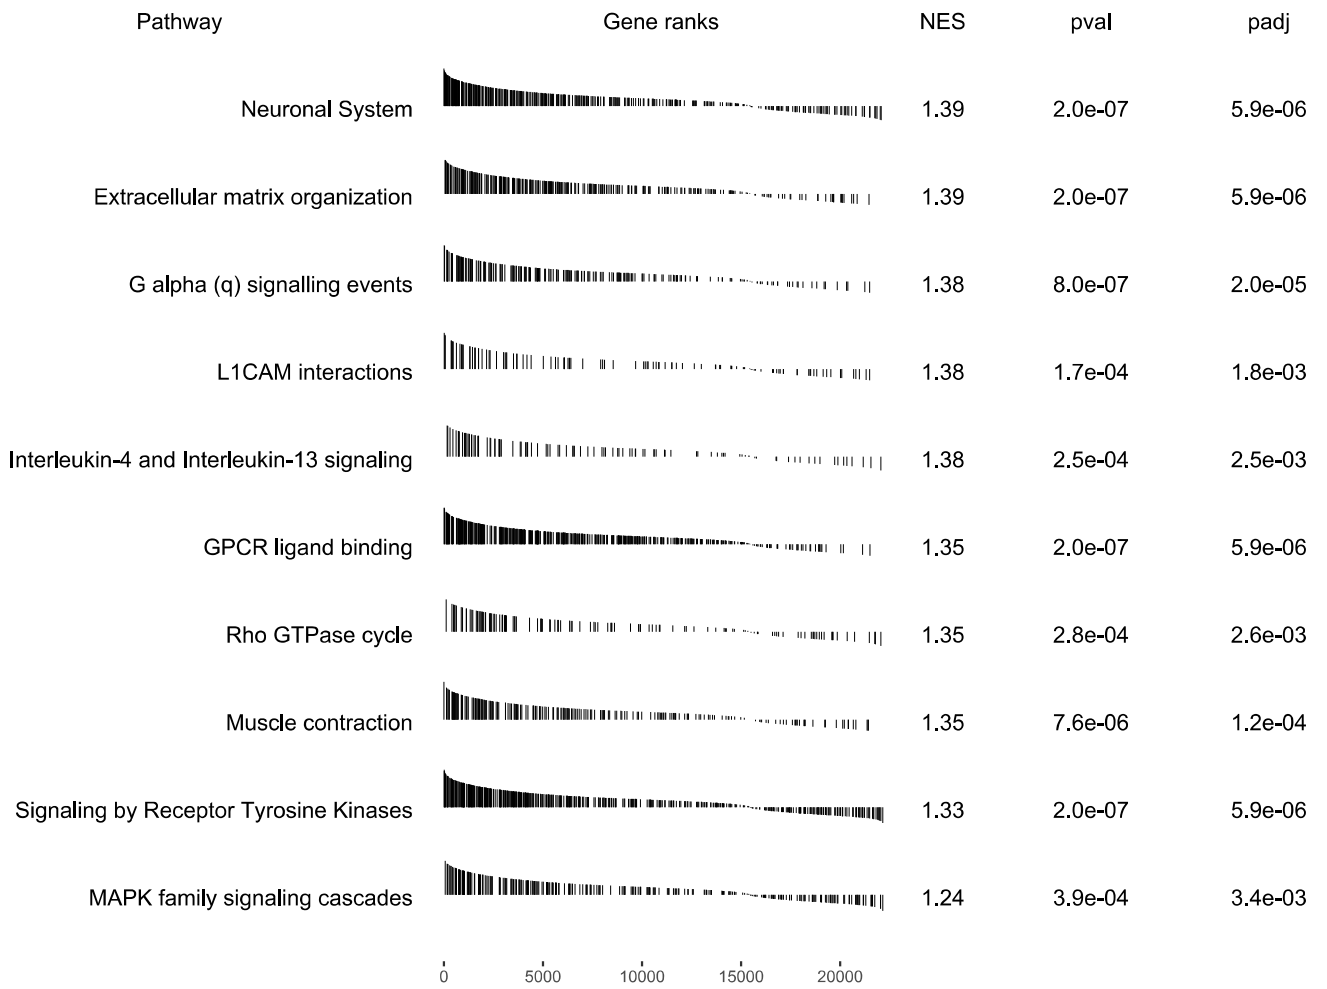

Supplement: 13148_2023_1598_MOESM4_ESM.pdf [file 13148_2023_1598_MOESM4_ESM.pdf]
